# Supplementary material for: Genome-wide identification and expression analysis of protein arginine methyltransferase and JmjC domain-containing family in apple
Source: Front Plant Sci. 2024 May 28;15:1381753. doi: 10.3389/fpls.2024.1381753 (PMC11165092; doi:10.3389/fpls.2024.1381753)
Supplement: Supplementary Table 4 — Orthologous gene pairs between apple, Arabidopsis, rice and zea mays JMJ and PRMT Genes. [file DataSheet_1.xlsx]

## Sheet: Table S1
Table S1: The JMJ and PRMT subunits in Arabidopsis
Gene family	Group	Gene Name	Gene ID
JMJs	KDM1/LSD1	FLD	AT3G10390
		LDL1	AT1G62830
		LDL2	AT3G13682
		LDL3	AT4G16310
	KDM5/JARID1	JMJ14	AT4G20400
		JMJ15	AT2G34880
		JMJ16	AT1G08620
		JMJ17	AT1G63490
		JMJ18	AT1G30810
		JMJ19	AT2G38950
	KDM4/JHDM3	JMJ13	AT5G46910
		JMJ12	AT3G48430
		JMJ11	AT5G04240
	KDM3/JHDM2	JMJ25	AT3G07610
		JMJ26	AT1G11950
		JMJ27	AT4G00990
		JMJ28	AT4G21430
		JMJ29	AT1G62310
		JMJ24	AT1G09060
	JMJD6	JMJ21	AT1G78280
		JMJ22	AT5G06550
	JMJC domina-only Group	JMJ20	AT5G63080
		JMJ30	AT3G20810
		JMJ31	AT5G19840
		JMJ32	AT3G45880
PRMTs		PRMT10	AT1G04870
		PRMT1a	AT2G19670
		PRMT4b	AT3G06930
		PRMT3	AT3G12240
		PRMT5	AT4G31120
		PRMT6	AT3G20020
		PRMT7	AT4G16570
		PRMT1b	AT4G29510
		PRMT4a	AT5G49020
Citation: [1] Liu C, Lu F, Cui X, Cao X. Histone methylation in higher plants. Annu Rev Plant Biol. 2010;61:395-420. [2] Zhou H, Liu Y, Liang Y, Zhou D, Li S, Lin S, Dong H, Huang L. The function of histone lysine methylation related SET domain group proteins in plants. Protein Sci. 2020 May;29(5):1120-1137. [3] Luo, M., Hung, FY., Yang, S. et al. Histone Lysine Demethylases and Their Functions i…

## Sheet: Table S2
Table S2: Conservative motif information of MdPRMT in apple
Motif	Logo	E-value	Sites	Width
motif 1		1e-124	12	29
motif 2		1.1e-123	12	29
motif 3		2.1e-103	11	29
motif 4		1.3e-102	4	50
motif 5		2.1e-88	4	50
motif 6		6.7e-77	4	47
motif 7		1.3e-67	8	41
motif 8		1.7e-67	3	49
motif 9		5.3e-55	3	41
motif 10		2.7e-49	12	19
motif 11		9.3e-67	5	50
motif 12		1.1e-47	3	41
motif 13		2.6e-47	3	41
motif 14		2.2e-38	7	29
motif 15		8.3e-33	11	21
motif 16		8.3e-27	2	50
motif 17		8.6e-30	3	28
motif 18		5.3e-25	2	50
motif 19		3.3e-22	3	29
motif 20		5.3e-20	2	50

## Sheet: Table S3
Table S3: Conservative motif information of MdJMJ in apple
Motif	Logo	E-value	Sites	Width
motif 1		1.4e-435	14	50
motif 2		5.4e-301	10	50
motif 3		5.3e-405	14	50
motif 4		8.4e-302	13	50
motif 5		6.8e-172	8	50
motif 6		3.4e-188	9	50
motif 7		6.4e-168	10	41
motif 8		8.4e-149	9	41
motif 9		3.2e-150	10	33
motif 10		3.3e-134	13	29
motif 11		5.4e-157	10	50
motif 12		1.5e-123	14	29
motif 13		6.4e-107	4	50
motif 14		4e-108	9	41
motif 15		1.8e-79	4	41
motif 16		2.1e-76	13	27
motif 17		1.8e-107	7	49
motif 18		9e-75	4	50
motif 19		1.1e-73	4	50
motif 20		1.4e-71	4	50

## Sheet: Table S4
Table S4: Orthologous gene pairs between apple, Arabidopsis, rice and zea mays JMJ and PRMT Genes
Chr.	Gene Name	Gene ID		Chr.	Gene Name	Gene ID	Group
1	MdJMJ4	MD01G1103000	==	3	AtFLD	AT3G10390	JMJ
1	MdJMJ3	MD01G1082300	==	4	AtLDL1	AT4G00990
1	MdJMJ5	MD01G1106000	==	5	AtLDL2	AT5G04240
4	MdJMJ9	MD04G1229800	==	1	AtLDL3	AT1G08620
5	MdJMJ11	MD05G1351300	==	1	AtJMJ14	AT1G62310
5	MdJMJ11	MD05G1351300	==	1	AtJMJ15	AT1G11950
5	MdJMJ10	MD05G1326700	==	4	AtJMJ16	AT4G21430
6	MdJMJ14	MD06G1081900	==	1	AtJMJ17	AT1G63490
6	MdJMJ15	MD06G1159300	==	3	AtJMJ18	AT3G48430
7	MdJMJ17	MD07G1172400	==	5	AtJMJ19	AT5G04240
8	MdJMJ19	MD08G1186800	==	1	AtJMJ13	AT1G78280
10	MdJMJ23	MD10G1325700	==	1	AtJMJ12	AT1G62310
10	MdJMJ23	MD10G1325700	==	1	AtJMJ11	AT1G11950
10	MdJMJ21	MD10G1241100	==	2	AtJMJ25	AT2G34880
10	MdJMJ22	MD10G1304800	==	4	AtJMJ26	AT4G21430
12	MdJMJ25	MD12G1216600	==	1	AtJMJ27	AT1G09060
12	MdJMJ24	MD12G1046300	==	5	AtJMJ28	AT5G06550
14	MdJMJ27	MD14G1103700	==	1	AtJMJ29	AT1G63490
14	MdJMJ28	MD14G1165600	==	3	AtJMJ24	AT3G48430
14	MdJMJ29	MD14G1175900	==	5	AtJMJ21	AT5G63080
15	MdJMJ31	MD15G1372700	==	1	AtJMJ22	AT1G78280
12	MdJMJ24	MD12G1046300	==	4	ZmJMJ13	Zm00001eb200180
10	MdJMJ22	MD10G1304800	==	2	Zmmmp223	Zm00001eb106740
14	MdJMJ28	MD14G1165600	==	3	ZmJMJ18	Zm00001eb144170
10	MdJMJ22	MD10G1304800	==	7	Zmcl15997_2b	Zm00001eb323940
8	MdJMJ19	MD08G1186800	==	1	ZmJMJ17	Zm00001eb018970
15	MdJMJ31	MD15G1372700	==	1	ZmJMJ17	Zm00001eb018970
3	MdJMJ7	MD03G1220300	==	10	N/A	Zm00001eb416560
1	AtJMJ21	AT1G78280	==	3	OsFBO14	Os03t0389900
2	MdPRMT2	MD02G1074300	==	2	AtPRMT1a	AT2G19670	PRMT
2	MdPRMT2	MD02G1074300	==	4	AtPRMT1b	AT4G29510
4	MdPRMT3	MD04G1063800	==	4	AtPRMT7	AT4G16570
7	MdPRMT4	MD07G1046100	==	3	N/A	AT3G12270
8	MdPRMT5	MD08G1132700	==	4	AtPRMT5	AT4G31120
13	MdPRMT7	MD13G1168500	==	3	AtPRMT4b	AT3G06930
13	MdPRMT7	MD13G1168500	==	5	AtPRMT4a	AT5G49020
15	MdPRMT13	MD15G1203800	==	2	AtPRMT1a	AT2G19670
15	MdPRMT13	MD15G1203800	==	4	AtPRMT1b	AT4G29510
15	MdPRMT8	MD15G1111800	==	4	AtPRMT5	AT4G31120
16	MdPRMT14	MD16G1168900	==	3	AtPRMT4b	AT3G06930
16	MdPRMT14	MD16G1168900	==	5	AtPRMT4a	AT5G49020
13	MdPRMT7	MD13G1168500	==	2	ZmPRMT4	Zm00001eb111180
13	MdPRMT7	MD13G1168500	==	7	ZmPRMT3	Zm00001eb330380
16	MdPRMT14	MD16G1168900	==	7	ZmPRMT3	Zm00001eb330380
13	MdPRMT6	MD13G1002200	==	1	ZmPRMT6	Zm00001eb045210
13	MdPRMT6	MD13G1002200	==	10	ZmPRMT5	Zm00001eb433710

## Sheet: Table S5
Table S5: Homologous gene pairs in apple JMJ and PRMT genes
Chr.	Gene Name	Gene ID		Chr.	Gene ID	Gene ID	Group
1	MD01G1106000	MdJMJ5	==	7	MD07G1172400	MdJMJ17	JMJ
4	MD04G1229800	MdJMJ9	==	10	MD10G1182700	MdJMJ20
4	MD04G1229800	MdJMJ9	==	12	MD12G1246900	MdJMJ26
5	MD05G1326700	MdJMJ10	==	10	MD10G1304800	MdJMJ22
5	MD05G1351300	MdJMJ11	==	10	MD10G1325700	MdJMJ23
6	MD06G1159300	MdJMJ15	==	14	MD14G1165600	MdJMJ28
6	MD06G1081900	MdJMJ14	==	14	MD14G1103700	MdJMJ27
6	MD06G1026100	MdJMJ13	==	16	MD16G1280000	MdJMJ32
8	MD08G1186800	MdJMJ19	==	15	MD15G1372700	MdJMJ31
8	MD08G1004400	MdJMJ18	==	15	MD15G1003800	MdJMJ30
2	MD02G1074300	MdPRMT2	==	15	MD15G1203800	MdPRMT13	PRMT
2	MD02G1037100	MdPRMT1	==	15	MD15G1177300	MdPRMT12
8	MD08G1132700	MdPRMT5	==	15	MD15G1111800	MdPRMT8
13	MD13G1168500	MdPRMT7	==	16	MD16G1168900	MdPRMT14

## Sheet: Table S6
Table S6: Cis-regulatory elements present in the promoter regions of PRMT and JMJ Genes of apple
Gene Name	Low_Temperature	Circadian	Light	Endosperm	ATBP-1	GA	MeJA	Zein metabolism	ABRE	ARE	SA	Stress_Defense	MYB_drought	Auxin	Meristem	MYB_flavonoid	MYBHv1	Seed_specific	MYB_light	HD_ZIP 1	CMA3	Anoxic	Cell cycle	Endosperm-specific negative expression	Wound	Total
MdPRMT1	0	1	13	0	1	3	2	0	0	4	1	0	0	0	1	0	1	0	1	0	0	0	0	0	0	28
MdPRMT2	0	0	7	0	0	1	4	0	2	0	0	0	1	3	2	0	0	1	1	0	0	0	0	0	0	22
MdPRMT3	2	0	12	0	0	2	2	0	4	2	0	0	1	2	0	1	2	0	0	0	0	1	1	0	0	32
MdPRMT4	1	0	15	0	0	3	3	0	3	1	0	0	0	1	0	0	1	0	2	0	0	1	0	0	0	31
MdPRMT5	0	0	4	1	0	1	3	0	0	1	0	1	2	1	0	0	2	0	2	0	0	0	0	0	0	18
MdPRMT6	3	0	12	0	0	1	1	0	4	3	1	1	1	0	2	1	0	0	1	0	0	0	0	0	0	31
MdPRMT7	1	0	8	1	0	0	3	2	2	2	0	1	0	1	0	1	1	0	0	0	0	1	2	0	0	26
MdPRMT8	1	0	9	2	0	2	2	0	3	0	0	0	1	1	0	0	2	0	0	0	0	2	0	0	0	25
MdPRMT9	0	0	6	0	0	0	2	0	0	0	0	0	0	0	0	0	2	0	0	0	0	0	0	0	0	10
MdPRMT10	0	0	1	0	0	2	0	0	0	5	1	0	2	1	0	0	0	0	0	0	0	0	0	0	0	12
MdPRMT11	0	0	4	0	0	1	2	0	1	0	0	0	2	1	0	0	2	0	0	0	0	0	0	0	0	13
MdPRMT12	0	0	13	0	0	0	3	2	2	2	0	0	0	1	1	1	1	0	0	0	0	0	0	0	0	26
MdPRMT13	1	0	5	1	0	0	4	3	2	1	0	0	2	3	2	0	1	1	0	0	0	0	0	0	0	26
MdPRMT14	0	1	11	0	0	1	3	1	5	2	1	0	0	2	2	0	1	0	0	0	0	0	0	0	0	30
Total	9	2	120	5	1	17	34	8	28	23	4	3	12	17	10	4	16	2	7	0	0	5	3	0	0	330
MdJMJ1	0	1	10	0	0	2	2	1	1	2	2	1	1	0	0	0	0	0	1	0	0	0	0	0	0	24
MdJMJ2	1	1	8	0	0	1	2	0	1	2	0	0	1	0	1	0	0	0	0	0	0	0	0	0	1	19
MdJMJ3	2	0	15	0	0	0	5	1	8	1	0	1	1	0	2	0	2	0	0	0	0	0	0	0	0	38
MdJMJ4	0	0	11	0	0	2	0	0	2	1	0	0	0	0	0	0	0	0	0	0	0	0	0	0	0	16
MdJMJ5	1	0	12	0	0	0	6	1	2	3	1	0	2	0	1	1	0	0	0	0	0	1	0	0	0	31
MdJMJ6	1	0	10	0	2	2	2	1	3	1	1	1	2	1	1	0	1	0	0	0	0	0	0	0	0	29
MdJMJ7	2	0	18	0	0	0	1	1	6	1	0	0	1	0	0	0	1	2	0	0	0	0	0	0	0	33
MdJMJ8	1	0	6	0	0	1	1	0	1	2	1	0	0	1	0	0	0	0	0	0	0	0	0	0	0	14
MdJMJ9	2	0	7	0	0	2	0	1	1	4	2	0	1	0	0	0	0	0	0	0	0	0	0	0	0	20
MdJMJ10	2	0	9	0	1	0	4	1	4	3	3	1	0	1	0	0	0	0	1	0	0	0	0	0	0	30
MdJMJ11	2	0	8	1	0	0	0	0	0	3	0	1	2	0	1	1	1	0	0	0	0	1	0	1	0	22
MdJMJ12	1	0	11	0	0	0	7	1	5	1	1	0	0	1	0	0	0	0	0	0	0	2	0	0	0	30
MdJMJ13	3	0	5	0	0	1	1	1	1	0	0	1	0	1	1	0	0	0	0	0	0	0	0	0	0	15
MdJMJ14	0	0	8	0	0	1	2	1	2	9	2	0	0	4	1	0	0	0	0	0	0	0	0	0	0	30
MdJMJ15	2	0	16	0	0	2	5	0	5	4	2	1	1	0	1	0	0	0	0	0	0	0	0	0	0	39
MdJMJ16	0	0	7	0	0	2	4	1	0	3	0	0	2	0	0	0	0	0	1	0	0	0	0	0	0	20
MdJMJ17	0	0	9	0	0	0	1	0	1	3	0	1	3	0	0	0	2	0	0	0	0	1	0	0	0	21
MdJMJ18	0	0	8	1	0	1	2	0	2	2	1	0	1	1	0	0	0	0	0	0	0	0	0	0	0	19
MdJMJ19	0	0	16	0	0	0	1	0	0	1	2	0	0	0	0	0	0	0	2	0	0	0	0	0	0	22
MdJMJ20	1	0	14	0	0	1	2	0	7	1	0	0	1	1	0	0	1	0	1	0	1	0	0	0	0	31
MdJMJ21	0	0	25	1	0	0	2	1	7	1	0	0	0	1	1	0	0	0	1	0	0	0	0	0	0	40
MdJMJ22	0	0	10	1	0	0	0	1	4	3	1	1	2	0	0	0	1	0	1	0	0	0	0	0	0	25
MdJMJ23	0	1	8	3	0	1	0	0	1	4	2	0	0	2	1	0	1	0	0	0	0	0	0	0	0	24
MdJMJ24	0	1	6	0	0	0	1	1	1	2	0	0	1	2	0	0	1	1	0	0	0	0	0	0	0	17
MdJMJ25	1	0	8	0	0	1	5	0	4	1	1	0	0	2	0	0	1	0	2	0	0	0	0	0	0	26
MdJMJ26	0	0	10	0	1	0	1	1	4	4	1	0	2	0	0	0	1	0	0	0	0	0	0	0	0	25
MdJMJ27	0	0	14	0	0	3	1	2	2	4	0	0	0	1	1	0	0	0	0	0	0	0	0	0	0	28
MdJMJ28	1	0	9	2	0	0	3	0	3	6	0	0	0	1	1	0	0	0	0	0	0	0	0	0	0	26
MdJMJ29	1	0	5	0	1	0	1	1	3	2	1	1	2	0	0	0	2	0	1	0	0	0	0	0	0	21
MdJMJ30	0	0	5	0	1	0	2	1	2	3	1	0	3	4	0	0	0	0	0	0	2	0	0	0	0	24
MdJMJ31	4	0	16	0	0	0	5	0	2	0	0	0	2	2	1	0	0	0	0	0	0	0	0	0	0	32
MdJMJ32	2	0	8	0	0	0	1	0	1	3	0	1	1	1	0	1	1	0	0	0	0	0	0	0	0	20
Total	30	4	332	9	6	23	70	19	86	80	25	11	32	27	14	3	16	3	11	0	3	5	0	1	1	811

## Sheet: Table S7
Table S7: Cis-regulatory elements present in the promoter regions of JMJ Genes of Arabidopsis
Gene Name	Low_Temperature	Circadian	Light	Endosperm	ATBP-1	GA	MeJA	Zein metabolism	ABRE	ARE	SA	Stress_Defense	MYB_drought	Auxin	Meristem	MYB_flavonoid	MYBHv1	Seed_specific	MYB_light	HD_ZIP 1	CMA3	Anoxic	Cell cycle	Endosperm-specific negative expression	Wound	Total
PRMT10	0	0	14	0	0	4	1	0	1	2	0	1	3	0	0	0	0	0	1	0	0	0	0	0	0	27
PRMT1A	0	0	4	0	0	1	2	0	0	4	0	1	1	0	0	0	0	0	1	0	0	0	0	0	0	14
PRMT4B	0	1	8	0	0	2	3	0	0	2	0	0	3	1	0	0	0	0	0	0	0	0	0	0	0	20
PRMT3	2	0	9	0	1	3	2	1	1	2	1	0	3	0	0	1	1	0	0	0	0	1	0	0	0	28
PRMT5	1	1	13	0	0	4	0	0	1	5	0	1	2	1	0	0	0	0	0	0	0	0	0	0	1	30
PRMT6	0	0	10	0	0	0	4	0	0	1	1	1	0	0	0	0	0	0	1	0	0	0	0	0	0	18
PRMT7	1	0	15	0	0	2	1	1	1	1	2	1	2	0	0	0	0	0	0	0	0	2	0	0	0	29
PRMT1B/PRMT11	1	0	10	0	0	0	1	1	0	2	0	0	1	3	0	0	1	0	0	0	0	0	0	0	0	20
PRMT4A	0	1	12	0	0	0	3	0	0	2	0	0	0	0	0	0	0	0	0	0	0	0	0	0	0	18
Total	5	3	95	0	1	16	17	3	4	21	4	5	15	5	0	1	2	0	3	0	0	3	0	0	1	204
JMJ16	1	0	8	0	0	1	1	0	1	1	2	0	1	2	1	0	0	0	1	0	0	0	0	0	0	20
JMJ24	2	0	7	0	0	0	1	0	3	2	0	1	1	1	0	0	0	1	2	0	0	0	0	0	0	21
JMJ26	1	0	5	0	1	0	8	0	1	7	1	0	1	2	0	0	1	0	0	0	0	0	0	0	0	28
JMJ18	0	0	11	0	0	0	0	0	1	2	1	2	3	0	0	0	1	0	1	0	0	0	0	0	0	22
JMJ29	0	2	16	0	0	0	0	1	0	3	3	1	0	0	0	1	1	0	2	0	0	0	0	0	0	30
LDL1	2	0	6	0	0	0	0	1	1	3	2	1	0	0	0	0	1	0	1	0	0	1	0	0	0	19
JMJ17	0	0	13	0	0	0	0	0	1	1	0	1	1	0	0	0	0	0	0	0	0	0	0	0	0	17
JMJ21	0	0	12	0	0	0	0	2	2	0	1	0	3	0	1	0	0	0	0	0	0	0	0	0	0	21
JMJ15	2	0	8	0	0	0	0	0	1	5	2	1	3	0	1	1	0	0	1	0	1	0	0	0	0	26
JMJ19	1	0	4	0	1	0	0	0	1	3	1	1	0	0	1	0	0	0	1	0	0	0	0	2	0	16
JMJ25	0	0	11	1	0	0	0	1	1	4	0	2	1	0	0	0	0	0	0	0	0	0	1	0	0	22
FLD	3	0	5	0	0	0	0	1	1	5	1	1	2	0	1	1	0	0	0	0	0	0	0	0	0	21
LDL2	1	0	14	0	0	0	0	0	2	4	0	1	0	0	1	0	2	0	0	0	0	1	0	0	0	26
JMJ30	1	1	5	0	0	0	0	0	1	3	0	0	0	0	0	0	0	0	1	0	0	0	0	0	0	12
JMJ32	0	0	5	0	2	0	0	1	1	1	0	1	1	0	0	0	0	0	0	0	0	0	0	0	0	12
JMJ12	1	1	7	0	0	0	0	0	1	5	0	0	0	0	0	1	1	0	0	0	0	0	0	0	0	17
JMJ27	1	1	11	0	0	0	0	0	1	1	0	2	0	0	0	0	0	0	0	0	0	0	0	0	0	17
LDL3	2	1	7	0	0	0	0	0	0	4	0	0	0	0	1	0	1	0	0	0	1	0	0	0	0	17
JMJ14	0	0	8	2	0	0	0	1	0	3	0	0	0	0	1	0	1	0	1	0	0	0	0	0	0	17
JMJ28	1	0	9	0	0	0	0	0	1	2	0	0	0	0	2	0	1	0	0	0	0	0	0	0	0	16
JMJ11	1	1	5	0	0	0	0	2	1	5	0	1	0	0	0	0	0	0	1	0	0	0	0	0	0	17
JMJ22	0	0	11	0	0	0	0	1	1	2	0	1	0	0	1	0	0	0	0	0	0	0	0	0	0	17
JMJ31	0	0	3	0	0	0	0	1	5	2	0	0	0	0	0	0	0	0	1	0	0	0	0	0	0	12
JMJ13	1	0	12	0	0	0	0	0	1	4	2	0	0	0	1	0	0	0	0	0	0	0	0	0	0	21
JMJ20	0	0	17	0	0	0	0	1	0	1	1	1	0	0	1	0	0	1	0	0	0	0	0	0	0	23
Total	21	7	220	3	4	1	10	13	29	73	17	18	17	5	13	4	10	2	13	0	2	2	1	2	0	487

## Sheet: Table S8
Table S8 qPCR primer sequence
Gene name	Primer	prodSize
MdJMJ32	F:GATTCGGTTTCTGCGGTTGTGTTG	104
	R:GCCTTCCTTCCACCATCTCATTCC
MdJMJ33	F:ACGGGAAAGTCAGATGGAAACAGC	105
	R:GCTCGCACGCTCCTCAGATTG
MdJMJ34	F:CACCCTCCCTCCTTCCTTTCTCTC	106
	R:CTCTTCGGATTCTTCGTCGTCGTC
MdJMJ35	F:ACAGAGCATTCCGTACAGCCATTG	107
	R:CCATCATCGAGAGCAACCCAGTTC
MdJMJ36	F:GGGATGAGCCAGAGGGATAGAGTC	108
	R:ATTACCACCACTGCCGAAGTTGTC
MdJMJ37	F:GTGGAGAATGAGTATGGGGCAAGG	109
	R:GTTCACAGTTGGCGGTGTCCTC
MdJMJ38	F:AGGCGATAATGGAGGGCTCTGTAG	110
	R:GTAGAAGAAGACGACGACGAAGCG
MdJMJ39	F:TGTCAATGGGTCGCCGAAAGAAC	111
	R:CACATGGACTCGTCGTGGTTGG
MdJMJ40	F:AACCGCCGCACCGACCTC	112
	R:GCTCAACGCCGCCGATGG
MdJMJ41	F:TTGACGTGGGAGCTGGGACTG	113
	R:GCCATGTCGGAGCACTCAACC

## Sheet: Table S9
Table S9 Duplicate gene types in the MdJMJ and MdPRMT gene family
Gene family	Type	Gene ID	Gene name		Gene ID	Gene name	E-value
MdJMJ	WGD	MD01G1106000	MdJMJ5	==	MD07G1172400	MdJMJ17	0
		MD04G1229800	MdJMJ9	==	MD10G1182700	MdJMJ20	1.69e-218
		MD04G1229800	MdJMJ9	==	MD12G1246900	MdJMJ26	0
		MD08G1186800	MdJMJ19	==	MD15G1372700	MdJMJ31	0
		MD08G1004400	MdJMJ18	==	MD15G1003800	MdJMJ30	0
		MD06G1159300	MdJMJ15	==	MD14G1165600	MdJMJ28	0
		MD06G1081900	MdJMJ14	==	MD14G1103700	MdJMJ27	0
		MD06G1026100	MdJMJ13	==	MD16G1280000	MdJMJ32	0
		MD05G1351300	MdJMJ11	==	MD10G1325700	MdJMJ23	0
		MD05G1326700	MdJMJ10	==	MD10G1304800	MdJMJ22	0
	TD	MD00G1097500	MdJMJ1	==	MD00G1097600	MdJMJ2	6.08e-92
	TRD	MD01G1218500	MdJMJ6	==	MD01G1082300	MdJMJ3	1.37e-282
		MD03G1220300	MdJMJ7	==	MD01G1103000	MdJMJ4	5.69e-264
		MD06G1012500	MdJMJ12	==	MD05G1351300	MdJMJ11	3.19e-257
MdPRMT	WGD	MD13G1168500	MdPRMT7	==	MD16G1168900	MdPRMT14	0
		MD08G1132700	MdPRMT5	==	MD15G1111800	MdPRMT8	2.72e-105
		MD02G1074300	MdPRMT2	==	MD15G1203800	MdPRMT13	2.93e-265
		MD02G1037100	MdPRMT1	==	MD15G1177300	MdPRMT12	1.25e-268
	PD	MD15G1112100	MdPRMT9	==	MD15G1112600	MdPRMT10	2.01e-266
		MD15G1112100	MdPRMT9	==	MD15G1112700	MdPRMT11	2.76e-161
	TRD	MD13G1002200	MdPRMT6	==	MD15G1203800	MdPRMT13	7.26e-74
